# Supplementary material for: PbLAC4-like, activated by PbMYB26, related to the degradation of anthocyanin during color fading in pear
Source: BMC Plant Biol. 2021 Oct 13;21:469. doi: 10.1186/s12870-021-03220-1 (PMC8515750; doi:10.1186/s12870-021-03220-1)
Supplement: Supplementary file 7 — Additional file 7: Table S3. Sequences of primers used for vector construction. [file 12870_2021_3220_MOESM7_ESM.xlsx]

## Sheet: Sheet1
Table S3
Sequences of primers used for vector construction.
Primer Name	Primer Sequence (5’-3’)
62SK-GUS-F	tagaactagtggatccATGTTACGTCCTGTAGAAACCCCA
62SK-GUS-R	cggtatcgataagcttTCATTGTTTGCCTCCCTGCT
62SK-PbLAC4-like-F	tagaactagtggatccATGGTGTGGTCGATTCGATTT
62SK-PbLAC4-like-R	cggtatcgataagcttTTAACATTTTGGGAGATCCTTTG
62SK-PbMYB26-F	tagaactagtggatccATGGGACATCACTCATGTTGC
62SK-PbMYB26-R	cggtatcgataagcttTCAATGAGCGTTAAAGTTTGC
pET28a(+)-PbLAC4-like-F	aatgggtcgcggatccATGGTGTGGTCGATTCGATTT
pET28a(+)-PbLAC4-like-R	ggtggtggtgctcgagACATTTTGGGAGATCCTTTGGA
pAbAi-proPbLAC4-like-F	aaaagcttgaattcgagctcCTTCGGTTTAAATTTGATTGGC
pAbAi-proPbLAC4-like-R	atgcctcgaggtcgacATTTTACATTTCTTGTTGGTCGGAT
AD-PbMYB26-F	gccatggaggccagtgaattcATGGGACATCACTCATGTTGC
AD-PbMYB26-R	cagctcgagctcgatggatccTCAATGAGCGTTAAAGTTTGC
0800-LUC-proPbLAC4-like-F	cggtatcgataagcttAGTCATGTGTTTGTGTGGGAGG
0800-LUC-proPbLAC4-like-R	tagaactagtggatccCTATTGGTGTTGGGTTCATGGT
